# Supplementary material for: Global transcriptomic analysis of Lactobacillus delbrueckii subsp. bulgaricus ATCC11842 reveals the role of LDB_RS05285 in the post-acidification of yogurt
Source: Royal Society of Chemistry journal article supplement (doi:10.1039/d1fo01357b), 2021-01-01
Supplement: d1fo01357b1.pdf [file d1fo01357b1.pdf]

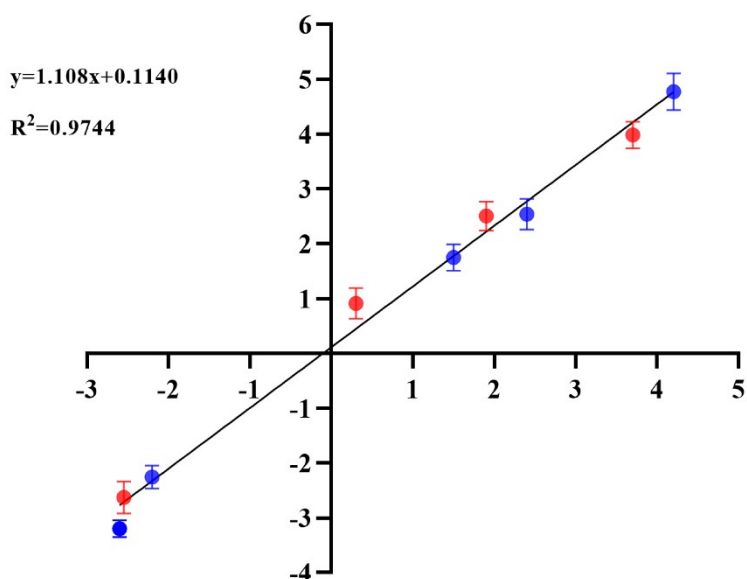

**Fig. S1** Correlation analysis of the gene expression levels between qPCR and transcriptome data for nine selected genes. The nine analyzed genes and primers are listed in Table S1. Each point represents a value of fold-change of the expression level of acid-stress treatment compared with the control group.
