# Supplementary material for: Global transcriptomic analysis of Lactobacillus delbrueckii subsp. bulgaricus ATCC11842 reveals the role of LDB_RS05285 in the post-acidification of yogurt
Source: Royal Society of Chemistry journal article supplement (doi:10.1039/d1fo01357b), 2021-01-01
Supplement: d1fo01357b2.pdf [file d1fo01357b2.pdf]

**Table S1.** Primers of 69 acid-responsive genes that are not affected by cold stress and 9 selected randomly DEGs involved in acid treatment.

| <b>Gene</b>        | <b>primer sequence (5'-3')</b>                     |
|--------------------|----------------------------------------------------|
| <i>LDB_RS04545</i> | F-GTGTGCCGACCTTGATT<br>R-CATAACTGTTTCTGGGTGAGC     |
| <i>LDB_RS08540</i> | F-TAGCGTAAGCCCAGTTCTG<br>R-TCTTGGTGCTCTTCTCTGC     |
| <i>LDB_RS08995</i> | F-GGAATACGACTTGACCAACCC<br>R-GCGGGAAGAAGGGAATGTA   |
| <i>LDB_RS08180</i> | F-CGACATCTACTATCCCAACGA<br>R-ATGCTTTCCTTGCTCCTCC   |
| <i>LDB_RS06685</i> | F-AACAGGCAAGGCGATTTTC<br>R-TGACTCCAGGCTGATTGAA     |
| <i>LDB_RS04910</i> | F-GCTGGTTGGTGAGGTGTATC<br>R-CCGCCTTATTGTCTTCATCA   |
| <i>LDB_RS00230</i> | F-GAAGAATGGGATGTTGGC<br>R-AGACTGACAGCAAGCGGTA      |
| <i>LDB_RS09405</i> | F-GGACTTGAAAGAAGGGCA<br>R-GCTGACCTGGCTTGATTA       |
| <i>LDB_RS07400</i> | F-GTCTGCCAAACACCAACTT<br>R-GATGAAGAAGCCCAGGAA      |
| <i>LDB_RS02160</i> | F-TGAAGAGCAGGGATACGGA<br>R-CCCAAAGTGCTCAAATGC      |
| <i>LDB_RS01180</i> | F-AGATGAGCACGAATACACCG<br>R-GTTCTTCTTCTTGTCGCTGTCA |
| <i>LDB_RS02235</i> | F-TGTCAACCTGGAACCTTGC<br>R-TCGGCTTCTCAATGGTCT      |
| <i>LDB_RS02865</i> | F-ATGGCAAGAAGCACTGGA<br>R-CCAAGAAGGCATAGACGCT      |
| <i>LDB_RS02760</i> | F-TTACACCCTTTACCTGACC<br>R-GCTGTTGACCTTCTTGACG     |
| <i>LDB_RS02860</i> | F-TGAGAAAGTCCAATAGCCG<br>R-GAAGGCATCCAGGTTGAA      |
| <i>LDB_RS07105</i> | F-TGCCGACTTGTTTCTTTACC<br>R-TCCAGCGACATTGAGGTT     |
| <i>LDB_RS03130</i> | F-GCTCACCAAAGACCATCATC<br>R-TGTCGCAGTCAGCAGTTCT    |
| <i>LDB_RS04920</i> | F-TTGCCTGGTGAAGTAATCC<br>R-GTCCAAAGTCAAACCGATG     |
| <i>LDB_RS05285</i> | F-CGTTGTCTTAGCGATTCCAGT<br>R-AGCGTCATCATTTACAGGAGA |
| <i>LDB_RS07675</i> | F-TTGGCTGTTCACTTCTGGC<br>R-TCCATCTTCTTGTTGCGG      |
| <i>LDB_RS08325</i> | F-ACTGGCAAGAAAGACGATG<br>R-AACGGTGGAGACGGATAA      |
| <i>LDB_RS00225</i> | F-ACACCCGACATTTCTTATGC<br>R-ACCTGCCCAACCTAATCTG    |

|                    |                                                      |
|--------------------|------------------------------------------------------|
| <i>LDB_RS02215</i> | F-AGAACAACAACCTGGACGC<br>R-CCCTTAGCCACGATAACCA       |
| <i>LDB_RS02220</i> | F-GGTAGCCAAGGTCTATGTTGAA<br>R-CTGATGAGTAAATGGACAAGCC |
| <i>LDB_RS02230</i> | F-CAAGATGCTGCCTGATAACC<br>R-ACGCCATTGAACCACTTC       |
| <i>LDB_RS05810</i> | F-ACAAGAAGAAGCAGGAAAGC<br>R-CGGAAGTTGGCGATAAAC       |
| <i>LDB_RS01340</i> | F-TAATCGCCTTTGCCCTCT<br>R-CGGCGAAGATTGCTAAATAG       |
| <i>LDB_RS07405</i> | F-ATGAAATCCCACCTTACGAC<br>R-TCAAAGTCCCGTTATCTGG      |
| <i>LDB_RS00495</i> | F-TTTCGGAAGTCTTGAGCG<br>R-CCCGATAATGTAGGCAACC        |
| <i>LDB_RS05660</i> | F-AGGAGGCAGCATCAAAGA<br>R-GTTGGCAAATGGTGTGTC         |
| <i>LDB_RS01085</i> | F-CGGTTCAAAGGTTGCTCT<br>R-TGCGTAGTCATCATCTTCGT       |
| <i>LDB_RS02620</i> | F-GTAACCATTCCGCTTCCAT<br>R-ACCTTCTCCTCTTCAACCG       |
| <i>LDB_RS10750</i> | F-TGAAGATAATGGTTCCCGC<br>R-TGGTAGGCAAGAAGTTCGG       |
| <i>LDB_RS00810</i> | F-CTCATACAACGACACTGGCT<br>R-CGTAAGCAACCGAGATTTG      |
| <i>LDB_RS08785</i> | F-CTAACGCCTTTGACTGCTC<br>R-TCTTGCCTCGGTAAACTTG       |
| <i>LDB_RS06340</i> | F-GCTTGGTCTGCTCAGTTCAC<br>R-CTTCCATTTCCGCAATAACC     |
| <i>LDB_RS05555</i> | F-ATTGAACTGACCGAGGCTG<br>R-CGATTGAAGAAGAGACGGAA      |
| <i>LDB_RS07770</i> | F-TTATCCGCCTAAGACCAGC<br>R-CAAGTCAATCCCGCAAAG        |
| <i>LDB_RS02110</i> | F-CCCACCCACAATACTCAGA<br>R-GCAAGAAGGCGTATGAAC        |
| <i>LDB_RS06895</i> | F-TGGTCCTGTTACGATTCC<br>R-TCCATCTTGCCATTGACG         |
| <i>LDB_RS08505</i> | F-GTGGCGTTTACTGGTTCAA<br>R-CCGTCTTCATCTTCTTACC       |
| <i>LDB_RS02225</i> | F-TGGTGGTCTTTGAATCAGC<br>R-TGTAGGTCATCCCGTTTGA       |
| <i>LDB_RS04520</i> | F-GGCAGGTATGGAAAGACAA<br>R-CCGATAAACTGAATGACCG       |
| <i>LDB_RS05665</i> | F-GGCTGGTCGTCACTAAAGATG<br>R-CGTAATCAGGGTTGTTCGG     |
| <i>LDB_RS08320</i> | F-CCCTAACCCAGCATTCTCTTT<br>R-ATAATGGACCGCTTGACG      |
| <i>LDB_RS06880</i> | F-TATCCTGCCTGCCGTGTTT<br>R-CGAATCAAGTAGTAGACGCCA     |

|                    |                                                    |
|--------------------|----------------------------------------------------|
| <i>LDB_RS00370</i> | F-GCCGCTAACAAGGAATACG<br>R-CGCAAAGTCAAAGACCTCA     |
| <i>LDB_RS02765</i> | F-AACTGAACCCAATGCTGAC<br>R-TCGTCCATCAAGTCCTCAT     |
| <i>LDB_RS04625</i> | F-GTCACCGTCAAGAATCTGC<br>R-TCCAAGGTCTGTAGTTCCTGT   |
| <i>LDB_RS10060</i> | F-CCTTATGACCGAAACTTCAGC<br>R-CCATCAGCCAAGATTACGG   |
| <i>LDB_RS08560</i> | F-CATCATCATCCAGCAAGTCT<br>R-TAGTGGCGGTTGAAGAGTC    |
| <i>LDB_RS06890</i> | F-CAACGGGACAGAAATCTTG<br>R-TAGTCGGAGTGCTTGGTTC     |
| <i>LDB_RS08265</i> | F-CTAATCATTGCTTCCGTTGC<br>R-GAACCAAGTATGTCAAAGGCTG |
| <i>LDB_RS02250</i> | F-TGTGGGCGAGACAGTTGTA<br>R-CTCGGTCATTGAAATCTTGC    |
| <i>LDB_RS02145</i> | F-CAGGACCACTTTGCCTTT<br>R-TAACCTTGTCGCTTTCCG       |
| <i>LDB_RS02340</i> | F-CTATCTCAACTCTCTCCGTGC<br>R-ACTACCCAGACGATGACCA   |
| <i>LDB_RS05955</i> | F-TTCCATTCCACAGTCAGATG<br>R-GATTTGGCTCAACTTCGTG    |
| <i>LDB_RS07140</i> | F-TTCTGTTGCTGTTCAAGGAG<br>R-CGGCTGTTTCTTCTTTGG     |
| <i>LDB_RS06900</i> | F-TACCTGGACAAGCACAACG<br>R-GGTGTAGTGAAGAGGCTGT     |
| <i>LDB_RS10075</i> | F-CAATGGGTGAACGGAAAG<br>R-TTGAGTAGACAGTTGCCGC      |
| <i>LDB_RS00580</i> | F-TCTGGCTGAGTAAAGTGGCT<br>R-ACCTCAAAGCGACAACA      |
| <i>LDB_RS08185</i> | F-TCAACCCTAAGCAAGTTCCG<br>R-AGGTGATAAAGTAGAAGTCCGC |
| <i>LDB_RS00585</i> | F-CCGTAAGCCGTTCTTGAT<br>R-TGGCGTAATCAGTCCTATCA     |
| <i>LDB_RS05380</i> | F-ATCGTGCCTACTCCAGTCTG<br>R-GGTCGTTTCAGCATAACAGC   |
| <i>LDB_RS00250</i> | F-TGAAGACAAGCGGCAGAA<br>R-AGCAGGAAGAGGGTGGAAA      |
| <i>LDB_RS03405</i> | F-CTAACGAACGCAATGCTG<br>R-GCTAAACGACTCTTGTACAG     |
| <i>LDB_RS08695</i> | F-TGGCTCCTAATGAAGTTGC<br>R-GAAGTATTGCTTGGGATTGG    |
| <i>LDB_RS00270</i> | F-GTTCCGGCTTTACTCCACTTT<br>R-CGTATTGCCAGTCGTTGT    |
| <i>LDB_RS01245</i> | F-AGTCCTTTCTCAATCATCG<br>R-ACGCTCAAACCGCTAAAC      |
| <i>LDB_RS01640</i> | F-ATGAATCACGCAAGCACG<br>R-CCAACCTGGGAAACGATAACTC   |

|                    |                                                      |
|--------------------|------------------------------------------------------|
| <i>LDB_RS03500</i> | F-TGGAACGAAGCAGTCAAGG<br>R-TGGGTGAATGTGGATAGCA       |
| <i>LDB_RS07710</i> | F-CCAGGTCATCATAACGGTCA<br>R-CAGAAACGCTATCCGAAACA     |
| <i>LDB_RS07165</i> | F-CAGTATTCGTTGGTCCATCAG<br>R-CGACTTG TTCCTTGGTAGCA   |
| <i>LDB_RS05610</i> | F-AAGACAGTTTACGGTGACACG<br>R-CTCGTTGATGGACTTCGGA     |
| <i>LDB_RS08890</i> | F-GAATCAGCGACGACACCC<br>R-CAGTTGGCAGGCTTGGAG         |
| <i>LDB_RS09670</i> | F-CGATGATGAGCGAAGAAGTCTG<br>R-TGACAGAGGTTGGTTGGATTC  |
| <i>LDB_RS00400</i> | F-TGCTGACGGTGTGTTGTTGTTT<br>R-TTACGCAGGCTCATCTTAGTGA |
| <i>LDB_RS03675</i> | F-ACGGTGCTGTTGGTTTGACTA<br>R-CCTTCTTTGAGCCGATGACA    |
