# Supplementary material for: Global transcriptomic analysis of Lactobacillus delbrueckii subsp. bulgaricus ATCC11842 reveals the role of LDB_RS05285 in the post-acidification of yogurt
Source: Royal Society of Chemistry journal article supplement (doi:10.1039/d1fo01357b), 2021-01-01
Supplement: d1fo01357b3.pdf [file d1fo01357b3.pdf]

Table S2. Differentially expressed genes screened out by transcriptome sequencing under acid stress.

| Original geneID | New geneID  | geneLength | K-Express | 1-Express | Express | CK-FPKM  | T1-FPKM   | Ratio(T1/ | P-value   | FDR                           | GG Orthol   | Component | Function | GO Process | Blast nr                                                                    |
|-----------------|-------------|------------|-----------|-----------|---------|----------|-----------|-----------|-----------|-------------------------------|-------------|-----------|----------|------------|-----------------------------------------------------------------------------|
| Ldb1956         | LDB_RS08505 | 330        | 1         | 26        | 0.69    | 17.66    | 4.677452  | 2.62E-07  | 4.32E-07  | -                             | -           | -         | -        | -          | -                                                                           |
| Ldb0606         | LDB_RS02620 | 558        | 1610      | 23170     | 613.81  | 8682.24  | 3.8222032 | 0         | 0         | -                             | -           | -         | -        | -          | -                                                                           |
| Ldb1239         | LDB_RS05285 | 2289       | 2557      | 35653     | 220.74  | 3029.95  | 3.778874  | 0         | 0         | ∫T_11322                      | -           | -         | -        | -          | per-exporting P-type ATPase A [Beauveria bassiana D1-5]                     |
| Ldb1595         | LDB_RS06880 | 246        | 11        | 111       | 10.87   | 107.4    | 3.3045701 | 6.82E-22  | 1.55E-21  | -                             | -           | -         | -        | -          | -                                                                           |
| Ldb0095         | LDB_RS03070 | 856        | 1243      | 10807     | 297.7   | 2545.92  | 3.096256  | 0         | 0         | ∫mgr:MG                       | -           | -         | -        | -          | lyoxal reductase [Lichtheimia corymbifera [JRC:FSU:9682]                    |
| Ldb1039         | LDB_RS04545 | 519        | 197       | 1491      | 81.36   | 605.15   | 2.8949012 | 6.16E-242 | 5.09E-241 | -                             | -           | -         | -        | -          | -                                                                           |
| Ldb1915         | LDB_RS08325 | 750        | 837       | 5825      | 231.44  | 1584.03  | 2.7748895 | 0         | 0         | -                             | -           | -         | -        | -          | -                                                                           |
| Ldb1914         | LDB_RS08325 | 444        | 246       | 1579      | 120.98  | 762.76   | 2.6564606 | 7.95E-234 | 6.46E-233 | -                             | -           | -         | -        | -          | -                                                                           |
| Ldb0144         | LDB_RS05885 | 381        | 58        | 341       | 33.96   | 196.03   | 2.5291661 | 3.55E-49  | 1.12E-48  | -                             | -           | -         | -        | -          | -                                                                           |
| Ldb1095         | LDB_RS10060 | 1470       | 86.5      | 474       | 11.78   | 63.53    | 2.4310985 | 6.46E-65  | 2.33E-64  | -                             | -           | -         | -        | -          | rate reductase flavoprotein subunit [Beauveria bassiana D1-5]               |
| Ldb1112         | LDB_RS10075 | 1470       | 86.5      | 474       | 11.78   | 63.53    | 2.4310985 | 6.46E-65  | 2.32E-64  | -                             | -           | -         | -        | -          | rate reductase flavoprotein subunit [Beauveria bassiana D1-5]               |
| Ldb0262         | LDB_RS01085 | 366        | 2228      | 12038     | 1366.57 | 7247.83  | 2.4069898 | 0         | 0         | -                             | -           | -         | -        | -          | -                                                                           |
| Ldb2020         | LDB_RS08785 | 474        | 94.28     | 495.84    | 43.08   | 222.59   | 2.3692986 | 1.28E-65  | 4.68E-65  | -                             | -           | -         | -        | -          | 4/Chemotaxis protein LafT [Beauveria bassiana D1-5]                         |
| malG            | LDBND_0175  | 807        | 34        | 167       | 8.69    | 41.99    | 2.2726177 | 4.54E-22  | 1.03E-21  | -                             | -           | -         | -        | -          | ansport system permease protein malG [Beauveria bassiana D1-5]              |
| pmi             | LDB_RS0230  | 963        | 522       | 2529      | 110.62  | 527.24   | 2.2528476 | 6.00E-308 | 5.60E-307 | -                             | -           | -         | -        | -          | protein YPEUBRA_SCAF23g01578 [Pseudozyma brasiliensis CHG001]               |
| Ldb1968         | LDB_RS08560 | 990        | 77        | 371       | 15.85   | 75.12    | 2.2447142 | 1.77E-46  | 5.49E-46  | -                             | -           | -         | -        | -          | -                                                                           |
| Ldb0057         | LDB_RS02225 | 357        | 51        | 220       | 32.2    | 136.33   | 2.0819705 | 7.63E-26  | 1.84E-25  | -                             | -           | -         | -        | -          | -                                                                           |
| Ldb0063         | LDB_RS00250 | 603        | 47        | 199.72    | 16.46   | 68.75    | 2.0623954 | 3.71E-23  | 8.59E-23  | -                             | -           | -         | -        | -          | -                                                                           |
| Ldb0143         | LDB_RS00580 | 336        | 65        | 270       | 44.05   | 179.56   | 2.0272521 | 2.28E-30  | 5.92E-30  | -                             | -           | -         | -        | -          | -                                                                           |
| usp1            | LDBND_0649  | 462        | 1204      | 4987      | 566.19  | 2303.9   | 2.0247199 | 0         | 0         | -                             | -           | -         | -        | -          | -                                                                           |
| Ldb0289         | LDB_RS01180 | 426        | 1677      | 6803      | 864.27  | 3443.44  | 1.9942965 | 0         | 0         | ∫CCIG_05                      | -           | -         | -        | -          | 2/Hsp42p [Rhizophagus irregularis DAOM 197198w]                             |
| Ldb1597         | LDB_RS06890 | 369        | 1530      | 5821      | 929.61  | 3471.83  | 1.9009988 | 0         | 0         | -                             | -           | -         | -        | -          | -                                                                           |
| Ldb1548         | LDB_RS06685 | 366        | 33        | 125       | 20.24   | 75.26    | 1.894674  | 1.06E-13  | 2.07E-13  | -                             | -           | -         | -        | -          | -                                                                           |
| Ldb1598         | LDB_RS06895 | 420        | 1306      | 4603      | 684     | 2367.61  | 1.7913632 | 0         | 0         | -                             | -           | -         | -        | -          | 8/Tmnm related protein [Saccharomyces cerevisiae]                           |
| ppx             | LDB_RS02235 | 1512       | 412       | 1438      | 54.49   | 187.18   | 1.7803629 | 1.23E-129 | 7.26E-129 | -                             | -           | -         | -        | -          | -                                                                           |
| Ldb1790         | LDB_RS07770 | 306        | 11        | 37        | 8.33    | 27.48    | 1.7219936 | 0.0001745 | 0.0002569 | -                             | -           | -         | -        | -          | -                                                                           |
| Ldb1651         | LDB_RS07140 | 441        | 35        | 116       | 17.34   | 56.47    | 1.7033807 | 2.93E-11  | 5.46E-11  | -                             | -           | -         | -        | -          | -                                                                           |
| Ldb1902         | LDB_RS08265 | 447        | 163       | 535       | 79.55   | 256.49   | 1.6889687 | 4.66E-46  | 1.42E-45  | -                             | -           | -         | -        | -          | -                                                                           |
| Ldb2158         | LDB_RS09405 | 1815       | 11002     | 35145     | 1205.09 | 3789.19  | 1.6527486 | 0         | 0         | 27038g C                      | -           | -         | -        | -          | 9826e-51/YALI02D7038p [Yarrowia lipolytica]                                 |
| Ldb0782         | LDB_RS10750 | 141        | 25        | 79        | 51.76   | 159.22   | 1.621112  | 1.04E-07  | 1.75E-07  | -                             | -           | -         | -        | -          | -                                                                           |
| Ldb1300         | LDB_RS05555 | 855        | 121       | 370       | 29.09   | 87.49    | 1.5885948 | 9.70E-30  | 2.51E-29  | -                             | -           | -         | -        | -          | protein BATDEDRAFT_93072 [Batrachytrium dendrobatidis JAM81]                |
| Ldb1145         | LDB_RS04910 | 1941       | 257       | 774       | 26.27   | 77.89    | 1.5680219 | 3.17E-59  | 1.12E-58  | -                             | -           | -         | -        | -          | -                                                                           |
| Ldb0123         | LDB_RS00495 | 837        | 22        | 66        | 5.41    | 15.96    | 1.5607602 | 2.67E-06  | 4.24E-06  | -                             | -           | -         | -        | -          | -                                                                           |
| Ldb0526         | LDB_RS02250 | 324        | 173       | 505       | 122.38  | 350.49   | 1.5180055 | 1.16E-37  | 3.26E-37  | -                             | -           | -         | -        | -          | -                                                                           |
| Ldb1355         | LDB_RS05810 | 237        | 201       | 563       | 208.03  | 570.6    | 1.4556882 | 1.70E-39  | 4.87E-39  | -                             | -           | -         | -        | -          | -                                                                           |
| Ldb1640         | LDB_RS07105 | 279        | 222       | 619       | 187.85  | 513.48   | 1.450727  | 5.58E-43  | 1.66E-42  | -                             | -           | -         | -        | -          | -                                                                           |
| Ldb1767         | LDB_RS07675 | 183        | 40        | 111       | 57.83   | 156.77   | 1.4387595 | 7.52E-09  | 1.31E-08  | -                             | -           | -         | -        | -          | -                                                                           |
| Ldb1599         | LDB_RS06900 | 852        | 2062      | 5295      | 497.55  | 1256.73  | 1.3367613 | 0         | 0         | -                             | -           | -         | -        | -          | Potassium efflux system KefA [Beauveria bassiana D1-5]                      |
| glmS            | LDB_RS02110 | 1812       | 6234      | 15850     | 684     | 1711.79  | 1.3234375 | 0         | 0         | ne-fructos                    | -           | -         | -        | -          | ructose-6-phosphate aminotransferase [Nematocida parisii ERTm3]             |
| Ldb1711         | LDB_RS07405 | 852        | 722       | 1834      | 174.21  | 435.29   | 1.3211494 | 3.57E-107 | 1.82E-106 | -                             | -           | -         | -        | -          | -                                                                           |
| Ldb0324         | LDB_RS01340 | 267        | 101       | 255       | 90.17   | 223.12   | 1.3071004 | 3.79E-16  | 7.88E-16  | -                             | -           | -         | -        | -          | -                                                                           |
| Ldb1963         | LDB_RS08540 | 843        | 6181      | 15220     | 1508.4  | 3653.38  | 1.2762128 | 0         | 0         | -                             | -           | -         | -        | -          | -                                                                           |
| Ldb0641         | LDB_RS02765 | 885        | 1160      | 2852      | 268.82  | 650.14   | 1.2741099 | 1.18E-156 | 7.92E-156 | -                             | -           | -         | -        | -          | protein BATDEDRAFT_93175 [Batrachytrium dendrobatidis JAM81]                |
| Ldb1886         | LDB_RS01885 | 861        | 636       | 1554      | 151.76  | 364.74   | 1.2650768 | 2.63E-85  | 1.16E-84  | -                             | -           | -         | -        | -          | -                                                                           |
| pepD2           | LDB_RS08995 | 1401       | 1169      | 2756      | 167.33  | 388.23   | 1.2142155 | 1.79E-140 | 1.11E-139 | -                             | -           | -         | -        | -          | 57e-10/peptidase U34 [Magnaporthe oryzae Y34]                               |
| Ldb0640         | LDB_RS02760 | 570        | 661       | 1503      | 246.18  | 550.21   | 1.1602688 | 2.21E-72  | 8.60E-72  | -                             | -           | -         | -        | -          | -                                                                           |
| glnH2           | LDBND_0464  | 846        | 2445      | 5414      | 594.42  | 1294.67  | 1.1230299 | 1.85E-242 | 1.54E-241 | -                             | -           | -         | -        | -          | amine-binding periplasmic protein [Beauveria bassiana D1-5]                 |
| glnP            | LDBND_0663  | 669        | 2546      | 5571      | 796.31  | 1713.24  | 1.1053252 | 2.25E-243 | 1.88E-242 | -                             | -           | -         | -        | -          | rate transport system permease protein in glnK [Beauveria bassiana D1-5]    |
| Ldb1885         | LDB_RS01810 | 804        | 493       | 1077      | 126.54  | 271.9    | 1.1034827 | 2.13E-48  | 6.70E-48  | -                             | -           | -         | -        | -          | 1/hydrolase fold-3 domain protein [Aspergillus kawachii IFO 4308]           |
| glnA            | LDB_RS06340 | 1338       | 12612     | 27410     | 1893.67 | 4050.14  | 1.0967868 | 0         | 0         | C_059871g                     | -           | -         | -        | -          | -62/Glutamine synthetase [Beauveria bassiana D1-5]                          |
| glnH1           | LDB_RS02215 | 840        | 4164      | 8816      | 1020.04 | 2124.21  | 1.0583007 | 0         | 0         | -                             | -           | -         | -        | -          | amine-binding periplasmic protein [Beauveria bassiana D1-5]                 |
| Ldb1710         | LDB_RS07400 | 561        | 784       | 1658      | 297.14  | 617.64   | 1.0556234 | 1.12E-68  | 4.20E-68  | -                             | -           | -         | -        | -          | -                                                                           |
| glnM            | LDBND_0462  | 642        | 2345      | 4884      | 766.95  | 1570.47  | 1.033992  | 6.31E-192 | 4.72E-191 | -                             | -           | -         | -        | -          | 0/D-cysteine desulfhydrase [Beauveria bassiana D1-5]                        |
| Ldb1263         | LDB_RS05380 | 1185       | 2574      | 5301      | 438.65  | 888.91   | 1.0189671 | 7.24E-203 | 5.50E-202 | ∫T_127711                     | -           | -         | -        | -          | atative aminotransferase YfdZ [Beauveria bassiana D1-5]                     |
| pox1            | LDB_RS09670 | 1851       | 2398      | 53848     | 257.41  | 568.58   | 4.4661822 | 0         | 0         | ∫lacetolac                    | -           | -         | -        | -          | 5/Pyruvate dehydrogenase [Beauveria bassiana D1-5]                          |
| fumC            | LDB_RS01000 | 1404       | 2473      | 14684     | 353.2   | 2063.93  | 2.5468368 | 0         | 0         | ∫776g fum24 intrace24 catalyt | -           | -         | -        | -          | [Putative Fumarase [Absidia idahoensis var. thermophila]                    |
| citT            | LDB_RS09095 | 1419       | 3230      | 17105     | 456.25  | 2377.86  | 2.3817673 | 0         | 0         | -                             | -           | -         | -        | -          | L-traitrate/succinate antiporter [Beauveria bassiana D1-5]                  |
| pyrE            | LDB_RS06615 | 624        | 1041      | 2742      | 351.16  | 909.35   | 1.3727072 | 6.51E-169 | 4.54E-168 | ∫C orotat                     | -           | -         | -        | -          | sphoribosyl transferase [Trichosporon asahii var. asahii CBS 2479]          |
| pyrF            | LDB_RS06610 | 723        | 851       | 2030      | 244.77  | 574.18   | 1.2300763 | 3.14E-106 | 1.59E-105 | -                             | -           | -         | -        | -          | Uncharacterized protein ycm [Beauveria bassiana D1-5]                       |
| Ldb1893         | LDB_RS08220 | 246        | 0         | 14        | 0.001   | 13.55    | 13.726005 | 6.83E-05  | 0.0001024 | -                             | -           | -         | -        | -          | -                                                                           |
| Ldb1234         | LDB_RS05270 | 180        | 3         | 32        | 4.43    | 46.19    | 3.3822019 | 2.85E-07  | 4.67E-07  | -                             | -           | -         | -        | -          | -                                                                           |
| groES           | LDB_RS06995 | 285        | 627       | 4280      | 517.05  | 3460.43  | 2.7425756 | 0         | 0         | ∫137e-1317                    | -           | -         | -        | -          | rotein BOTBODRAFT_122058 [Botryobasidium botrysosum FD-172 SS1]             |
| groEL           | LDB_RS06990 | 1614       | 16666     | 112415    | 2060.34 | 13678.34 | 2.7309388 | 0         | 0         | ∫ngl:MGL_                     | 005488 biur | -         | -        | -          | proteinin BOTBODRAFT_122070, partial [Botryobasidium botrysosum FD-172 SS1] |
| mscL            | LDB_RS01315 | 477        | 81        | 547       | 36.75   | 243.83   | 2.7300595 | 1.33E-84  | 5.80E-84  | ∫large cc                     | -           | -         | -        | -          | protein BATDEDRAFT_34461 [Batrachytrium dendrobatidis JAM81]                |
| Ldb0482         | LDB_RS02060 | 651        | 297       | 1881      | 95.68   | 595.79   | 2.6385146 | 5.99E-276 | 5.32E-275 | -                             | -           | -         | -        | -          | 9/Universal stress protein E [Beauveria bassiana D1-5]                      |
| Ldb0568         | Ldb0568     | 249        | 3         | 19        | 2.92    | 18.11    | 2.6327463 | 0.0005555 | 0.0008006 | -                             | -           | -         | -        | -          | -                                                                           |
| Ldb0848         | LDB_RS03720 | 705        | 199       | 1231      | 58.81   | 357.76   | 2.6048587 | 1.11E-178 | 7.91E-178 | -                             | -           | -         | -        | -          | -                                                                           |
| Ldb1266         | LDB_RS05395 | 696        | 37        | 223       | 11.09   | 65.71    | 2.5668536 | 3.38E-33  | 9.08E-33  | -                             | -           | -         | -        | -          | -                                                                           |
| Ldb0659         | LDB_RS02850 | 375        | 32        | 192       | 19.08   | 112.41   | 2.5586373 | 1.03E-28  | 2.63E-28  | -                             | -           | -         | -        | -          | -                                                                           |
| fruK            | LDB_RS08890 | 915        | 3488      | 20283     | 780.24  | 4463.31  | 2.5161241 | 0         | 0         | -                             | -           | -         | -        | -          | Uncharacterized protein yniA [Beauveria bassiana D1-5]                      |
| Ldb0759         | LDB_RS03340 | 1350       | 9106      | 50858     | 1354.62 | 7445.46  | 2.4584728 | 0         | 0         | ∫idihydrol                    | -           | -         | -        | -          | al protein HMPREF1541_03883 [Cyphellophora europaea CBS 101466]             |
| Ldb2143         | LDB_RS09345 | 390        | 1882      | 10515     | 1072.77 | 5884.94  | 2.4556689 |           |           |                               |             |           |          |            |                                                                             |



|         |              |      |        |        |         |         |           |           |           |            |   |   |   |                                                                  |
|---------|--------------|------|--------|--------|---------|---------|-----------|-----------|-----------|------------|---|---|---|------------------------------------------------------------------|
| Ldb1591 | LDB_RS06860  | 1431 | 985    | 2139   | 137.93  | 294.77  | 1.0956534 | 3.52E-93  | 1.67E-92  | AN5939.21  | - | - | - | protein BATDEDRAFT_28917 [Batrachochytrium dendrobatidis JAM81]  |
| rpoZ    | LDB_RS06070  | 222  | 487    | 1055   | 547.46  | 1160.77 | 1.0842567 | 1.23E-46  | 3.81E-46  | -          | - | - | - | -                                                                |
| Ldb1589 | LDB_RS06850  | 771  | 790    | 1697   | 212.07  | 448.03  | 1.0790548 | 1.23E-72  | 4.81E-72  | g531914-ni | - | - | - | thetical protein RO3G_08703 [Rhizopus delemar RA 99-880]         |
| Ldb1432 | LDB_RS06160  | 357  | 703    | 1513   | 443.84  | 937.58  | 1.0789021 | 3.21E-65  | 1.17E-64  | -          | - | - | - | nyl-diaminopimelate desuccinylase [Beauveria bassiana D1-5]      |
| Ldb0208 | LDB_RS00875  | 1401 | 3200   | 6840   | 458.04  | 963.54  | 1.072871  | 7.94E-284 | 7.19E-283 | -          | - | - | - | -                                                                |
| Ldb1984 | LDB_RS08625  | 888  | 295    | 629    | 68.12   | 142.87  | 1.0685527 | 1.42E-27  | 3.57E-27  | -          | - | - | - | -                                                                |
| Ldb1632 | LDB_RS07065  | 237  | 393    | 841    | 406.74  | 852.35  | 1.0673391 | 1.37E-36  | 3.83E-36  | -          | - | - | - | -                                                                |
| Ldb2045 | LDB_RS008910 | 1209 | 1217   | 2578   | 203.1   | 423.34  | 1.0596266 | 3.89E-106 | 1.97E-105 | n:AFUA_6   | - | - | - | 24/putative protease yegQ [Beauveria bassiana D1-5]              |
| Ldb0044 | LDB_RS00175  | 2766 | 983    | 2080   | 69.95   | 145.71  | 1.0587039 | 8.61E-86  | 3.82E-85  | tion enzym | - | - | - | AD box family helicase [Schizosaccharomyces japonicus yFS275]    |
| Ldb2093 | LDB_RS09135  | 813  | 136    | 288    | 34.5    | 71.85   | 1.0583918 | 2.85E-13  | 5.53E-13  | -          | - | - | - | M3e-19/KLTH0D13992p [Lachancea thermotolerans]                   |
| truB    | LDB_RS05685  | 897  | 584    | 1235   | 133.42  | 277.54  | 1.0567208 | 1.32E-51  | 4.30E-51  | 81tRNA p   | - | - | - | cal protein LRAMOSA00334 [Absidia idahoensis var. thermophila]   |
| Ldb2188 | LDB_RS09535  | 372  | 138    | 292    | 83.06   | 172.54  | 1.0547051 | 2.05E-13  | 3.99E-13  | -          | - | - | - | -                                                                |
| Ldb1797 | LDB_RS07805  | 363  | 46     | 97     | 28.49   | 58.96   | 1.0492809 | 2.61E-05  | 4.01E-05  | -          | - | - | - | -                                                                |
| htrA    | LDB_RS00570  | 1284 | 4309   | 9039   | 675.34  | 1394.09 | 1.0456378 | 0         | 0         | -          | - | - | - | protein BATDEDRAFT_24209 [Batrachochytrium dendrobatidis JAM81]  |
| Ldb0677 | LDB_RS02935  | 732  | 9340   | 19571  | 2650.95 | 5462.58 | 1.043073  | 0         | 0         | -          | - | - | - | 52/Aspartate-tRNA ligase [Beauveria bassiana D1-5]               |
| Ldb1691 | LDB_RS07310  | 525  | 118    | 247    | 48.12   | 98.98   | 1.0405004 | 2.51E-11  | 4.68E-11  | 12381ADP-  | - | - | - | 9/MutT/nudix family protein [Cordyceps militaris CM01]           |
| glpQ    | LDB_RS08360  | 693  | 1303   | 2724   | 392.3   | 806.43  | 1.039592  | 7.92E-109 | 4.10E-108 | rophosph   | - | - | - | protein BATDEDRAFT_28907 [Batrachochytrium dendrobatidis JAM81]  |
| Ldb1151 | LDB_RS04940  | 309  | 38     | 79     | 28.44   | 57.99   | 1.0278827 | 0.000191  | 0.0002801 | 095g1aden  | - | - | - | ferase and sulfurtransferase UBA4 [Ogataea parapolyomorpha DL-1] |
| Ldb0341 | LDB_RS01420  | 2691 | 8452   | 17491  | 618.51  | 1260.14 | 1.0267152 | 0         | 0         | 3.6.3.2}K  | - | - | - | 24//catalyt                                                      |
| Ldb1732 | LDB_RS07515  | 936  | 6187   | 12797  | 1351.14 | 2749.24 | 1.0248557 | 0         | 0         | -          | - | - | - | -transporting ATPase, P-type 1 [Beauveria bassiana D1-5]         |
| Ldb1553 | LDB_RS06700  | 1548 | 7908   | 16291  | 1020.75 | 2069.61 | 1.0197294 | 0         | 0         | -          | - | - | - | -                                                                |
| hisS    | LDB_RS03900  | 1287 | 2463   | 5070   | 385.08  | 780.05  | 1.0184084 | 6.64E-194 | 5.00E-193 | 9601histid | - | - | - | 82/Histidine-tRNA ligase [Beauveria bassiana D1-5]               |
| Ldb0697 | LDB_RS03025  | 1005 | 601    | 1237   | 121.75  | 246.54  | 1.0179    | 1.05E-48  | 3.31E-48  | -          | - | - | - | e-25/beta-lactamase [Moniliophthora roeri MCA 2997]              |
| ilvE    | LDB_RS05575  | 1026 | 2511   | 5168   | 497.73  | 1007.85 | 1.0178457 | 1.53E-197 | 1.16E-196 | nched-cha  | - | - | - | hain amino acid aminotransferase [Rhizopus delemar RA 99-880]    |
| Ldb1684 | LDB_RS07280  | 1026 | 158    | 325    | 31.32   | 63.38   | 1.0169434 | 6.13E-14  | 1.21E-13  | -          | - | - | - | -                                                                |
| Ldb1985 | LDB_RS08630  | 3648 | 1549   | 3176   | 83.19   | 167.94  | 1.0134639 | 4.15E-121 | 2.36E-120 | -          | - | - | - | alar protein transport protein USO1 [Kluyveromyces marxianus]    |
| Ldb2070 | LDB_RS09300  | 1059 | 97     | 199    | 18.6    | 37.54   | 1.013126  | 4.92E-09  | 8.62E-09  | -          | - | - | - | -                                                                |
| Ldb0720 | LDB_RS03140  | 1305 | 2072   | 4244   | 319.3   | 643.6   | 1.0112518 | 8.67E-161 | 5.91E-160 | ECHADR/    | - | - | - | tical protein S40288_00663 [Stachybotrys chartarum IBT 40288]    |
| Ldb0331 | LDB_RS01375  | 711  | 104    | 213    | 30.46   | 61.34   | 1.0099122 | 1.53E-09  | 2.71E-09  | 12171.61pt | - | - | - | protein BATDEDRAFT_10172 [Batrachochytrium dendrobatidis JAM81]  |
| Ldb1301 | LDB_RS05560  | 2259 | 1546   | 3155   | 135.28  | 271.77  | 1.0064376 | 5.09E-119 | 2.83E-118 | 137361H-t  | - | - | - | tical protein MVEG_06061 [Mortierella verticillata NRRL 6337]    |
| Ldb1357 | LDB_RS05820  | 849  | 2926   | 5975   | 708.68  | 1423.45 | 1.0061856 | 6.12E-224 | 4.84E-223 | -          | - | - | - | cal protein CGLQ_13827 [Colletotrichum gloeosporioides Cg-14]    |
| ppc     | LDB_RS02135  | 2730 | 6118   | 12475  | 441.19  | 885.68  | 1.0053854 | 0         | 0         | -          | - | - | - | osphoenolpyruvate carboxylase [Beauveria bassiana D1-5]          |
| Ldb1803 | LDB_RS07835  | 1224 | 272.16 | 554.59 | 44.83   | 89.9    | 1.0038566 | 3.29E-22  | 7.53E-22  | -          | - | - | - | -                                                                |
| Ldb0364 | LDB_RS01535  | 243  | 46     | 94     | 46.14   | 92.35   | 1.001094  | 6.54E-05  | 9.82E-05  | -          | - | - | - | -                                                                |



|         |             |      |       |       |          |         |           |           |           |                    |   |   |   |                                                                               |
|---------|-------------|------|-------|-------|----------|---------|-----------|-----------|-----------|--------------------|---|---|---|-------------------------------------------------------------------------------|
| rpsB    | LDB_RS05760 | 762  | 26185 | 11767 | 7118.35  | 3145.94 | -1.178052 | 0         | 0         | B01254g s          | - | - | - | stical protein NDA1_0A03840 [Naumovozyma dairenensis CBS 421]                 |
| Ldb0644 | LDB_RS02780 | 486  | 2256  | 1030  | 1002.41  | 449.67  | -1.156534 | 6.26E-108 | 3.21E-107 | -                  | - | - | - | -                                                                             |
| Ldb0539 | LDB_RS02315 | 1293 | 1563  | 728   | 243.19   | 111.47  | -1.125428 | 2.02E-72  | 7.87E-72  | 18971 ami          | - | - | - | stical protein MVEG_06206 [Mortierella verticillata NRRL 6337]                |
| typA    | LDB_RS03360 | 1848 | 13267 | 6184  | 1426.49  | 654.49  | -1.124027 | 0         | 0         | 6 2 2e-29          | - | - | - | GTP-binding protein typA/BipA [Beauveria bassiana D1-5]                       |
| rimM    | LDB_RS05880 | 504  | 470   | 220   | 200.54   | 92.24   | -1.120426 | 9.90E-23  | 2.29E-22  | -                  | - | - | - | (guanine-N(1))-methyltransferase [Beauveria bassiana D1-5]                    |
| Ldb0823 | LDB_RS03615 | 1566 | 1446  | 680   | 184.43   | 85.36   | -1.111441 | 7.66E-66  | 2.80E-65  | AN5939.2           | - | - | - | rotein BOTBODRAFT_99843 [Botryobasidium botryosum FD-172 551]                 |
| Ldb0162 | LDB_RS00665 | 1146 | 505   | 238   | 89.13    | 41.33   | -1.108722 | 5.53E-24  | 1.30E-23  | -                  | - | - | - | Inner membrane protein YbiR [Beauveria bassiana D1-5]                         |
| purL    | LDB_RS06200 | 2223 | 990   | 470   | 88.06    | 41.16   | -1.097244 | 9.20E-45  | 2.79E-44  | osphoribos         | - | - | - | ribosylformylglycinamide synthase [Beauveria bassiana D1-5]                   |
| rpsP    | LDB_RS05880 | 273  | 8114  | 3908  | 7050.07  | 3328.28 | -1.082861 | 0         | 0         | 1064.1 sm          | - | - | - | al protein RirG_055850 [Rhizophagus irregularis DAOM 197198w]                 |
| Ldb1368 | LDB_RS05860 | 477  | 491   | 236   | 222.77   | 105.2   | -1.08242  | 1.83E-22  | 4.21E-22  | -                  | - | - | - | -                                                                             |
| tsf     | LDB_RS05755 | 1029 | 43792 | 21065 | 8653.73  | 4095.45 | -1.0793   | 0         | 0         | or:MPER_1          | - | - | - | stical protein MVEG_08529 [Mortierella verticillata NRRL 6337]                |
| purF    | LDB_RS06195 | 1479 | 747   | 360   | 101.08   | 47.94   | -1.076196 | 3.73E-33  | 1.00E-32  | 530 amidc          | - | - | - | midophosphoribosyltransferase [Beauveria bassiana D1-5]                       |
| rplA    | LDB_RS07190 | 696  | 32367 | 15660 | 9699.5   | 4614.58 | -1.071711 | 0         | 0         | _006380 z          | - | - | - | uction Of The 80s-eif5b-met-itramet Eukaryotic Translation Initiation Complex |
| purN    | LDB_RS06185 | 582  | 241   | 117   | 87.73    | 41.86   | -1.067498 | 1.46E-11  | 2.74E-11  | osphoribc          | - | - | - | 26/Polyphosphate kinase [Beauveria bassiana D1-5]                             |
| Ldb2162 | LDB_RS09425 | 1095 | 310   | 151   | 57.38    | 27.5    | -1.061116 | 2.32E-14  | 4.61E-14  | -                  | - | - | - | stical protein MVEG_02649 [Mortierella verticillata NRRL 6337]                |
| Ldb1686 | LDB_RS07290 | 837  | 213   | 105   | 52.38    | 25.4    | -1.044188 | 4.43E-10  | 7.98E-10  | -                  | - | - | - | -                                                                             |
| epsIM   | LDB_RS08420 | 912  | 3859  | 1908  | 866.24   | 421.32  | -1.03985  | 7.96E-155 | 5.28E-154 | -                  | - | - | - | -                                                                             |
| Ldb1336 | LDB_RS05715 | 477  | 559   | 278   | 253.62   | 123.92  | -1.033259 | 1.30E-23  | 3.05E-23  | -                  | - | - | - | -                                                                             |
| eno     | LDB_RS05525 | 1278 | 82961 | 41551 | 13065.84 | 6439.74 | -1.020726 | 0         | 0         | :CC1G_00044464//cd | - | - | - | 551e-99/CTP synthase [Beauveria bassiana D1-5]                                |
| Ldb0672 | LDB_RS02910 | 1632 | 1233  | 620   | 150.69   | 74.58   | -1.014723 | 7.41E-49  | 2.34E-48  | 05168 ami          | - | - | - | sothetical protein PDE_00321 [Penicillium oxalicum 114-2]                     |
| gmk2    | LDB_RS08800 | 543  | 168   | 85    | 66       | 32.82   | -1.007891 | 7.75E-08  | 1.31E-07  | C05956.1 f         | - | - | - | 17/guanylate kinase [Fusarium graminearum PH-1]                               |
| Ldb1587 | LDB_RS06840 | 660  | 1172  | 593   | 371.98   | 185.05  | -1.00731  | 7.12E-46  | 2.18E-45  | -                  | - | - | - | A carboxylase carboxyl transferase subunit beta [Beauveria bassiana D1-5]     |
| Ldb0442 | LDB_RS01875 | 1056 | 589   | 298   | 113.26   | 56.38   | -1.006383 | 7.01E-24  | 1.65E-23  | -                  | - | - | - | -                                                                             |
| phnE    | LDB_RS00860 | 813  | 2083  | 1056  | 528.35   | 263.45  | -1.003965 | 8.90E-80  | 3.71E-79  | -                  | - | - | - | liketo-D-gluconic acid reductase A [Beauveria bassiana D1-5]                  |
